# Supplementary material for: A glacial systems model configured for large ensemble analysis of Antarctic deglaciation
Source: Copernicus journal article supplement (doi:10.5194/tc-7-1949-2013), 2013-12-19
Supplement: Supplementary file 1 [file tc-7-1949-2013-supplement.pdf]

# Supplement to: A glacial systems model configured for large ensemble analysis of Antarctic deglaciation

Rob Briggs<sup>a,b</sup>, David Pollard<sup>c</sup>, Lev Tarasov<sup>a,\*</sup>

<sup>a</sup>*Department of Physics and Physical Oceanography, Memorial University of Newfoundland, St. Johns, NL A1B 3X7, Canada*

<sup>b</sup>*Now at C-CORE, St. John's, NL, Canada, A1B 3X5*

<sup>c</sup>*Earth and Environmental Systems Institute, Pennsylvania State University, University Park, PA, USA*

---

---

## 1. Supplementary figures and tables

Figures include: parameter sensitivity plots for the basal sliding coefficient and tidewater calving parametrization, temperature and precipitation fields used for the climate forcing, glacial indices used in the model, and some additional ensemble parameter sensitivities. Tables present the data used to tune and validate the SSM model.

---

\*Ph: 1-709-864-2675, Fax: 1-709-864-8739,  
Email address: lev@mun.ca (Lev Tarasov)  
URL: <http://www.physics.mun.ca/~lev/> (Lev Tarasov)

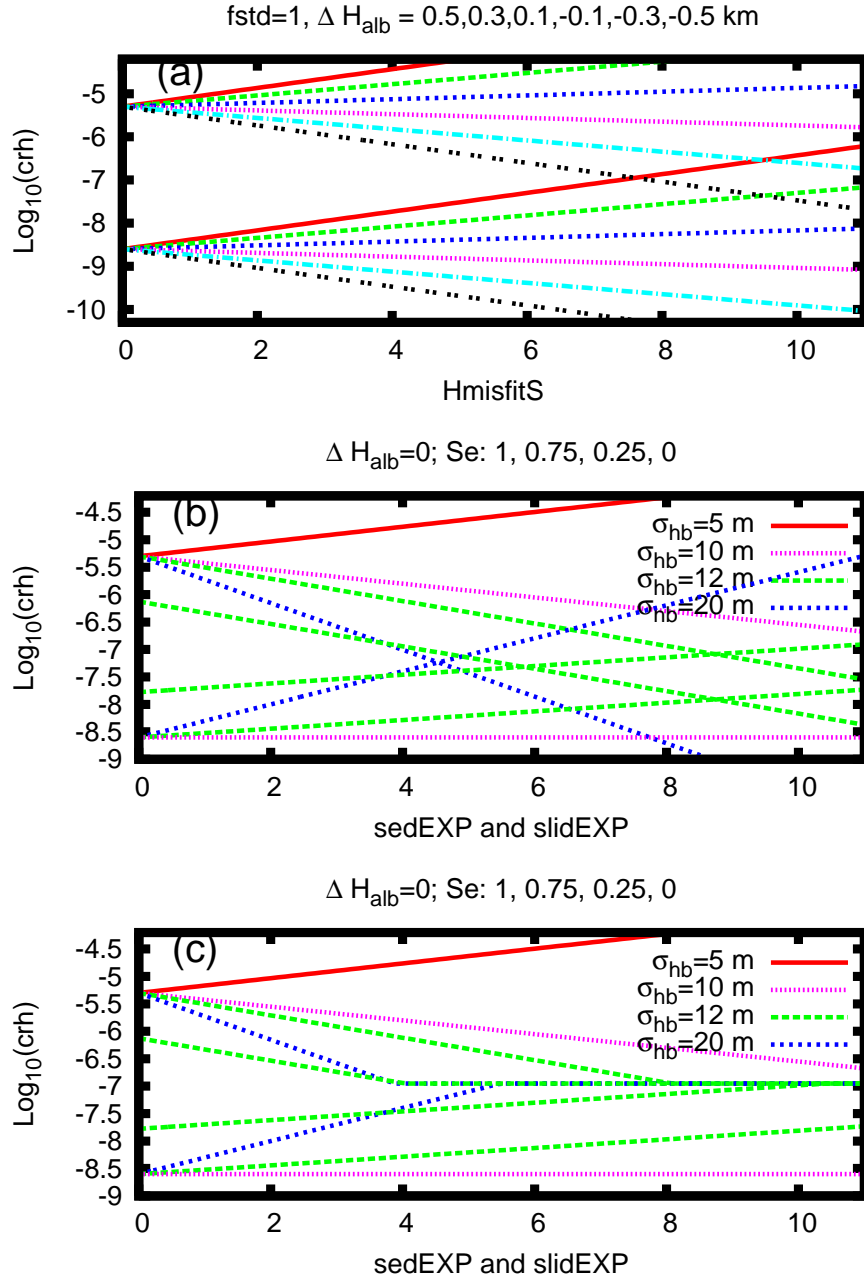

Figure 1: Parametric sensitivity of basal sliding coefficient to: a) **HmisfitS**, and for b) and c) to the sediment presence variable (Se), **sedEXP** and **slidEXP**. Plot (b) shows the case with inactive  $\Gamma_{bnd}$  as implemented for the results presented. Plot (c) is with  $\Gamma_{bnd} = (\text{slidsedC}/\text{slidhardC})^{(0.5-Se)}$  which sets crh to the geometric mean of **slidsedC** and **slidhardC**. The **slidsedC** and **slidhardC** values for baseline run nn2679 are used. The descending values of crh for **slidEXP**= 0 correspond to the descending values of Se.

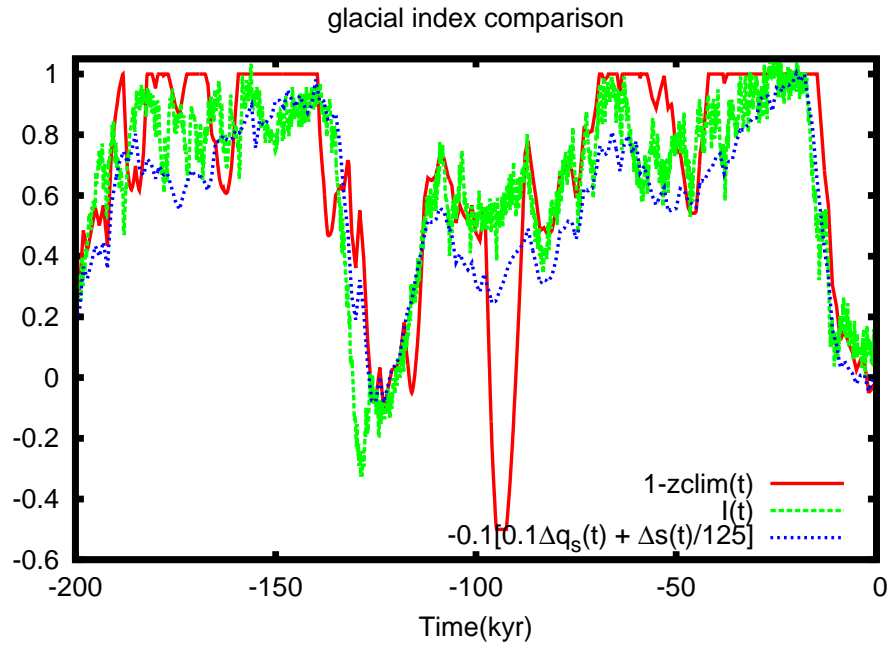

Figure 2: Comparison of three glacial climate indices used in the parametrizations.  $z_{clim}(t)$  is an SST interglacial index used for thin ice calving (eq. 24 in main text) and ice-shelf front melt (eq. 28).  $I(t)$  is the glacial index for temperature forcing  $Tf_3$  (eq. 9) and precipitation forcing  $Pf_3$  (eq. 16). The remaining index is  $-0.1 \times$  the time dependence for  $Tf_1$  (eq. 5).

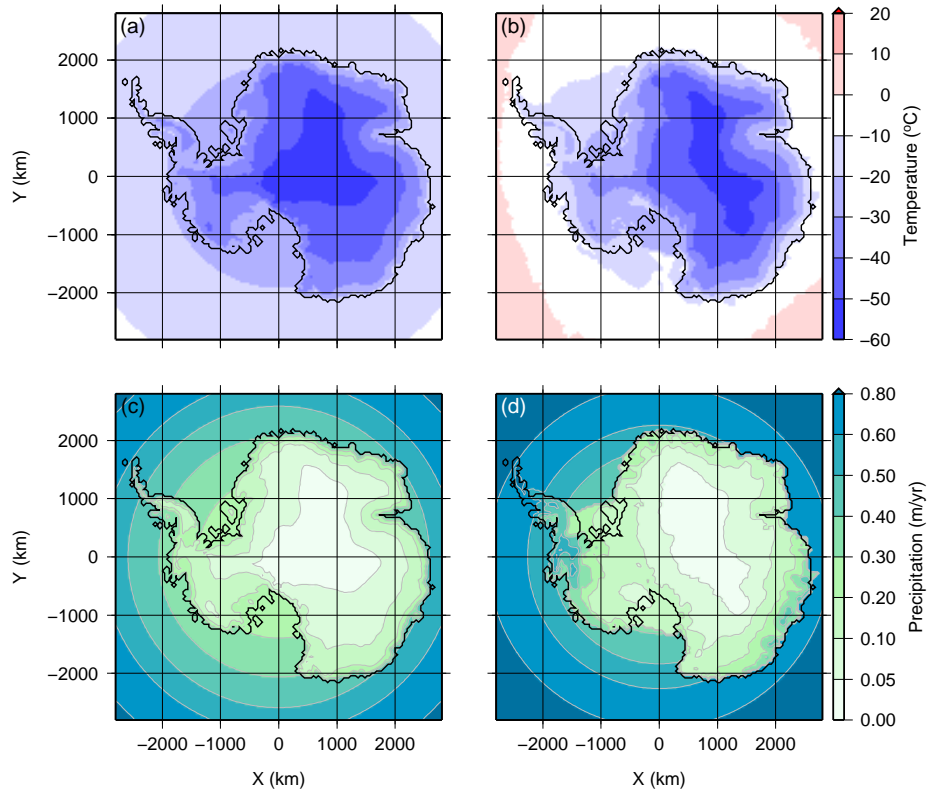

Figure 3: Present day climate forcing fields for (a)  $Tf1$ , (b)  $Tf2$ , (c)  $Pf1$ , and (d)  $Pf2$ .

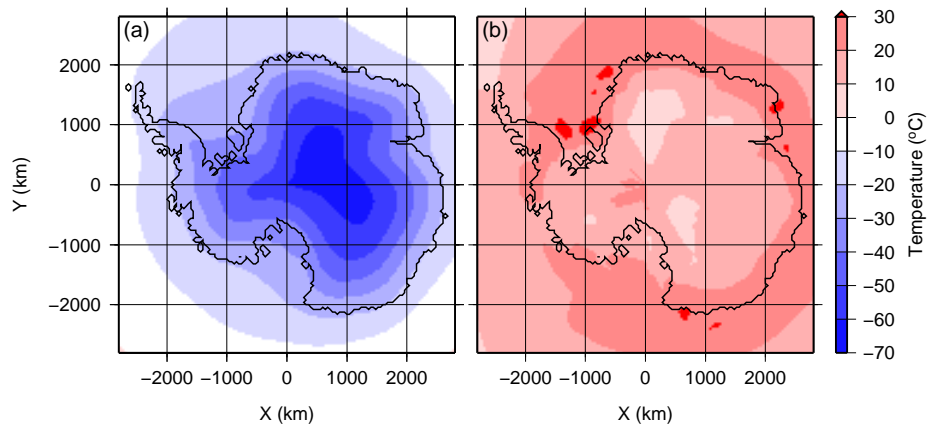

Figure 4: LGM temperature forcing fields, (a) shows  $Tave_{LGM}$  and (b) the associated EOF,  $Teof_{LGM}$ .

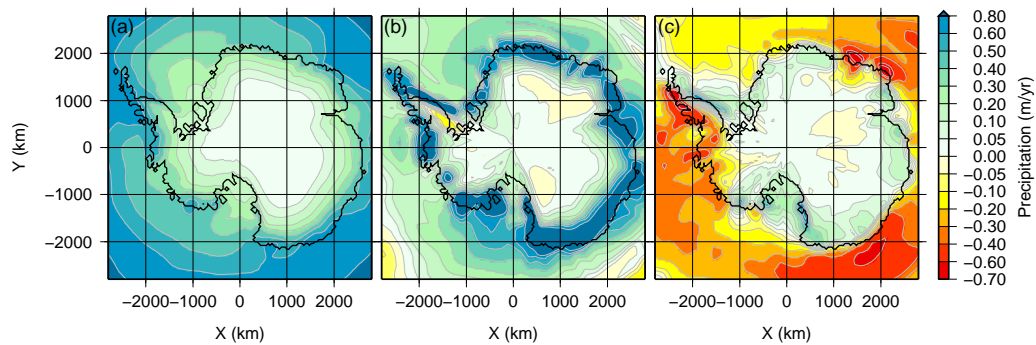

Figure 5: LGM precipitation forcing fields, (a) shows  $P_{ave_{LGM}}$ , (b) shows the associated EOF  $P_{eof1_{LGM}}$ , and (c)  $P_{eof2_{LGM}}$ .

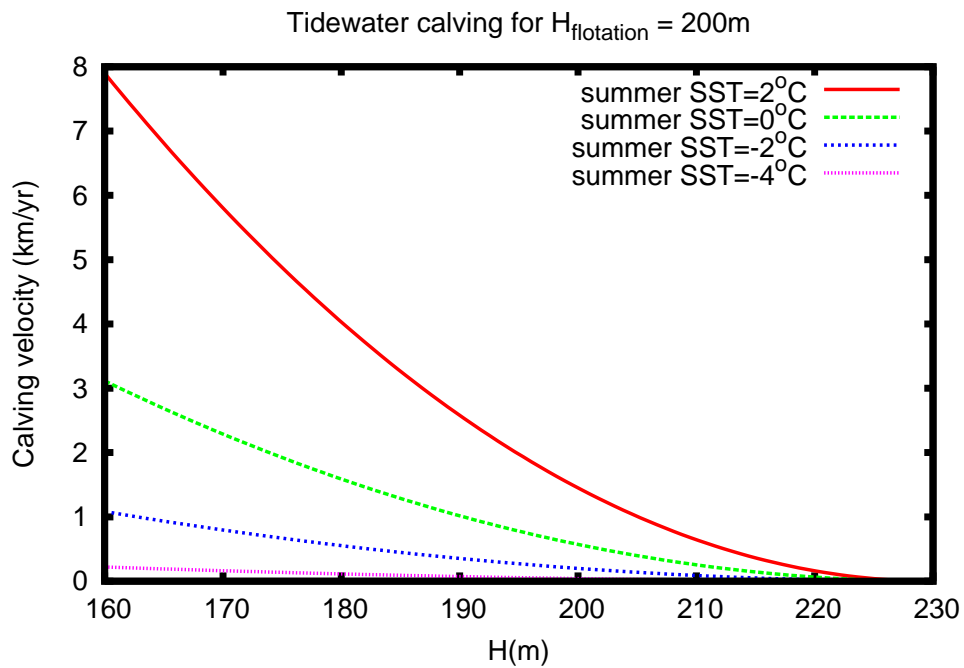

Figure 6: Tidewater calving parametrization response to ice thickness ( $H$ ) and summer sea surface temperature. The response shown is with the baseline nn2679  $calv_{maxV}$  calving velocity scale ensemble parameter value. For the given flotation thickness, calving velocity values are constant beyond the plotted limits for  $H$ .

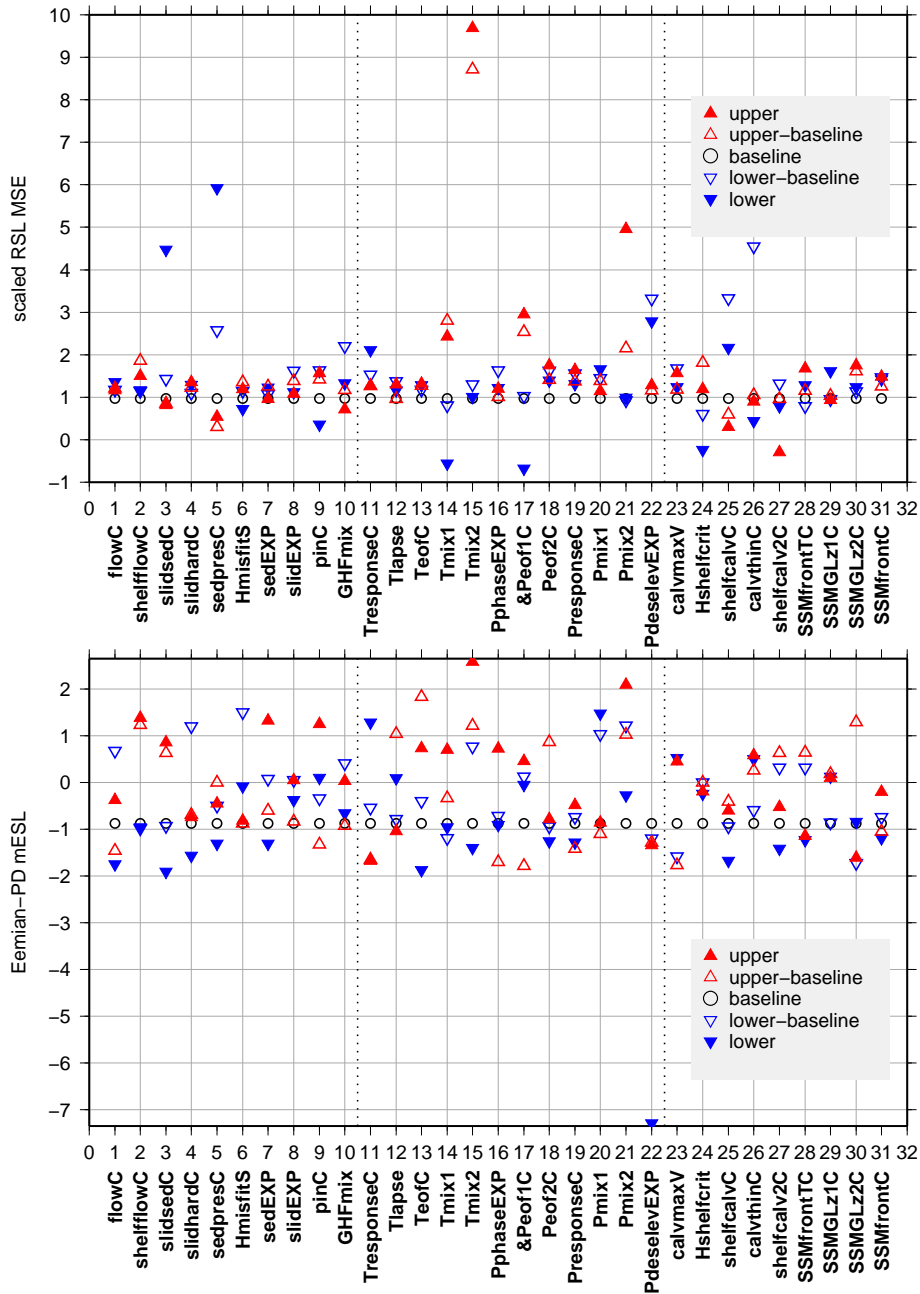

Figure 7: Sensitivity results for scaled (and weighted) RSL mean squared error (MSE, upper) and 120 ka - present-day ice volume (mESL, lower). Refer to Briggs and Tarasov (2013) for details on data-point weighting.

Table 1: Table of thickness (H) and melt rates for the AMY ice shelf. The data was extracted from Fig. 4 and Fig. 6 in Wen et al. (2007).

| (a)                                     |          |                                    | (b)                                     |          |                                    |
|-----------------------------------------|----------|------------------------------------|-----------------------------------------|----------|------------------------------------|
| Distance from<br>grounding line<br>(km) | H<br>(m) | Melt rate<br>(m yr <sup>-1</sup> ) | Distance from<br>grounding line<br>(km) | H<br>(m) | Melt rate<br>(m yr <sup>-1</sup> ) |
| 0                                       | 1600     | -1                                 | 325                                     | 660      | 0.25                               |
| 25                                      | 1540     | -4.5                               | 350                                     | 650      | -0.1                               |
| 50                                      | 1400     | -4.5                               | 375                                     | 640      | 0.0                                |
| 75                                      | 1220     | -2.5                               | 400                                     | 590      | 0.25                               |
| 100                                     | 1200     | -0.65                              | 425                                     | 575      | 0.25                               |
| 125                                     | 1150     | -0.45                              | 450                                     | 530      | 0.25                               |
| 150                                     | 1020     | -0.7                               | 475                                     | 510      | 0.2                                |
| 170                                     | 1010     | -0.1                               | 510                                     | 490      | 0.0                                |
| 185                                     | 980      | -0.5                               | 550                                     | 480      | 0.25                               |
| 210                                     | 930      | -1.25                              | 590                                     | 450      | 0.05                               |
| 230                                     | 900      | -0.75                              | 640                                     | 450      | 0.0                                |
| 260                                     | 860      | -0.4                               | 680                                     | 420      | -0.05                              |
| 280                                     | 750      | -0.5                               | 720                                     | 400      | -1.6                               |
| 310                                     | 700      | 0.15                               | 750                                     | 250      | -6                                 |

Table 2: Table of thickness (H) and melt rates for the RON ice shelf. The data was extracted from Fig 9. and Fig. 10 in Jenkins and Doake (1991).

| (a)                                     |          |                                    | (b)                                     |          |                                    |
|-----------------------------------------|----------|------------------------------------|-----------------------------------------|----------|------------------------------------|
| Distance from<br>grounding line<br>(km) | H<br>(m) | Melt rate<br>(m yr <sup>-1</sup> ) | Distance from<br>grounding line<br>(km) | H<br>(m) | Melt rate<br>(m yr <sup>-1</sup> ) |
| 0                                       | 2300     | -                                  | 345                                     | 640      | -                                  |
| 20                                      | -        | -22.5                              | 335                                     | -        | 0.5                                |
| 40                                      | 2000     | -                                  | 360                                     | -        | 1                                  |
| 60                                      | -        | -11                                | 375                                     | 600      | -                                  |
| 75                                      | 1640     | -                                  | 390                                     | -        | 1.5                                |
| 90                                      | -        | -6.5                               | 410                                     | 520      | -                                  |
| 110                                     | 1300     | -                                  | 430                                     | 480      | -                                  |
| 130                                     | -        | -3                                 | 420                                     | -        | 0.5                                |
| 140                                     | 1040     | -                                  | 430                                     | 480      | -                                  |
| 165                                     | -        | -2.5                               | 450                                     | -        | 0                                  |
| 180                                     | 920      | -                                  | 470                                     | 440      | -                                  |
| 200                                     | -        | -1.5                               | 485                                     | -        | 1.5                                |
| 220                                     | 840      | -                                  | 495                                     | 380      | -                                  |
| 235                                     | -        | -1.5                               | 505                                     | -        | 1.5                                |
| 255                                     | 760      | -                                  | 510                                     | 360      | -                                  |
| 265                                     | -        | -1                                 | 520                                     | -        | 1.5                                |
| 280                                     | 720      | -                                  | 525                                     | 300      | -                                  |
| 300                                     | -        | -0                                 | 530                                     | -        | -2.0                               |
| 315                                     | 700      | -                                  | 540                                     | 280      | -                                  |



Table 3: SSM observations as extracted from the literature.

| Shelf | Reference                | Type of data                                                | Value                                                | Method                     |
|-------|--------------------------|-------------------------------------------------------------|------------------------------------------------------|----------------------------|
| AMY   |                          |                                                             |                                                      |                            |
|       | Jacobs et al. (1996)     | Average rate (all Jacobs et al. (1996) estimates $\pm$ 50%) | 0.65 m yr <sup>-1</sup>                              | Measurement                |
|       | Jacobs et al. (1996)     | Net melt                                                    | 23 Gt yr <sup>-1</sup>                               | ''                         |
|       | Williams et al. (2001)   | Total melt                                                  | 5.8 Gt yr <sup>-1</sup> and 18.0 Gt yr <sup>-1</sup> | Model                      |
|       | Rignot and Jacobs (2002) | at grounding line                                           | 31.5 m yr <sup>-1</sup>                              | InSAR                      |
|       | Wen et al. (2007)        | Mean melt near the southern grounding line                  | 23.0 $\pm$ 3.5 m yr <sup>-1</sup>                    | In-situ and remote sensing |
|       | Wen et al. (2007)        | Freezing rates                                              | -0.5 $\pm$ 0.1 to -1.5 $\pm$ 0.2 m yr <sup>-1</sup>  | ''                         |
|       | Wen et al. (2007)        | Total basal melting                                         | 50.3 $\pm$ 7.5 Gt yr <sup>-1</sup>                   | ''                         |
|       | Wen et al. (2007)        | Total refreezing                                            | -7.0 $\pm$ 1.1 Gt yr <sup>-1</sup>                   | ''                         |
|       | Wen et al. (2007)        | Net basal melting                                           | 43.3 $\pm$ 6.5 Gt yr <sup>-1</sup>                   |                            |
|       | Yu et al. (2010)         | Net basal melting                                           | 27.0 $\pm$ 7.0 Gt yr <sup>-1</sup>                   | In-situ and remote sensing |
| ROS   |                          |                                                             |                                                      |                            |
|       | Jacobs et al. (1996)     | Average rate (excluding 100 km of shelf front)              | 0.22 m yr <sup>-1</sup>                              | Measurement                |
|       | Jacobs et al. (1996)     | Net melt (excluding 100 km of shelf front)                  | 81 Gt yr <sup>-1</sup>                               | ''                         |

Table 3: SSM observations continued.

|                       |                                                                |                                                       |                                                         |
|-----------------------|----------------------------------------------------------------|-------------------------------------------------------|---------------------------------------------------------|
| Holland et al. (2003) | Estimated from Fig 10, max melt at GL                          | 0.12 m yr <sup>-1</sup>                               | Model                                                   |
| Holland et al. (2003) | Estimated from Fig 10, average freeze cm                       | -0.02 m yr <sup>-1</sup>                              | ”                                                       |
| Loose et al. (2009)   | average basal melt rate of                                     | 33-50 km <sup>3</sup> /a                              | Noble gases, stable isotopes, and CFC transient tracers |
| Reddy et al. (2010)   | average basal melt rates of (including a seasonal signal)      | 0.1 m yr <sup>-1</sup>                                | CFC tracers                                             |
| Horgan et al. (2011)  | Melt law for shelf front (40 km by 760 km) within the front km | 16 km <sup>3</sup> /a<br>2.8 ± 1.0 m yr <sup>-1</sup> | Remote sensing<br>”                                     |

Table 3: SSM observations continued. Joughin and Padman (2003) employed two methods for the RON-FIL system, yielding two different net melt totals. The second method also enabled discrimination between RON and FIL. Both methods are quoted here. The values for grounding line melt, freeze on, and front melt are taken from Joughin and Padman (2003) Fig. 2

FIL-RON

|                          |                                             |                         |             |
|--------------------------|---------------------------------------------|-------------------------|-------------|
| Jacobs et al. (1996)     | Average rate (excluding 100 of shelf front) | 0.55 m yr <sup>-1</sup> | Measurement |
| Jacobs et al. (1996)     | Net melt (excluding 100 of shelf front)     | 202 Gt yr <sup>-1</sup> | ”           |
| Grosfeld et al. (1998)   | Net melt for FIL                            | 0.35 m yr <sup>-1</sup> | Model       |
| Rignot and Jacobs (2002) | at grounding line                           | 2-14 m yr <sup>-1</sup> | InSAR       |

Table 3: SSM observations continued.

|                           |                                            |                                    |                            |
|---------------------------|--------------------------------------------|------------------------------------|----------------------------|
| Joughin and Padman (2003) | Total net melt rate for FIL-RON (Method 1) | $83.4 \pm 24.8 \text{ Gt yr}^{-1}$ | In situ and remote sensing |
| Joughin and Padman (2003) | Total net melt rate for FIL-RON (Method 2) | $78.7 \text{ Gt yr}^{-1}$          | In situ and remote sensing |
| Joughin and Padman (2003) | RON grounding area melt                    | $50.4 \text{ Gt yr}^{-1}$          | ”                          |
| Joughin and Padman (2003) | RON freeze-on (-55.6+(-1.1))               | $-56.7 \text{ Gt yr}^{-1}$         | ”                          |
| Joughin and Padman (2003) | RON front melt                             | $55.9 \text{ Gt yr}^{-1}$          | ”                          |
| Joughin and Padman (2003) | FIL melt                                   | $20.6 \text{ Gt yr}^{-1}$          | ”                          |
| Joughin and Padman (2003) | FIL freeze-on                              | $-16.1 \text{ Gt yr}^{-1}$         | ”                          |
| Joughin and Padman (2003) | Downstream of Foundation Ice Stream        | $24.8 \text{ Gt yr}^{-1}$          | ”                          |
| <hr/>                     |                                            |                                    |                            |
| Other shelves             |                                            |                                    |                            |
| Jacobs et al. (1996)      | Total estimate - (AMY+ROS+FIL+RON)         | $450 \text{ Gt yr}^{-1}$           | Measurement                |

Table 4: Processed SSM observational data used for verification purposes.

| Shelf   | Melt type      | Avg. melt rate<br>(whole shelf)<br>$\text{m yr}^{-1}$ | $\pm$ | Mass loss<br>(whole shelf)<br>$\text{Gt yr}^{-1}$ | $\pm$            | Notes       | Reference                 |
|---------|----------------|-------------------------------------------------------|-------|---------------------------------------------------|------------------|-------------|---------------------------|
| AMY     | net melt       | 0.65                                                  | 0.325 | 23.3                                              | 11.5             |             | Jacobs et al. (1996)      |
|         | net melt       |                                                       |       | 43.0                                              | 6.5              |             | Wen et al. (2007)         |
|         | net melt       | 0.51                                                  | 0.13  | 27.0                                              | 7.0              |             | Yu et al. (2010)          |
|         | freeze on      | -0.5 $\rightarrow$ -1.5                               |       | 7.0                                               | -1.1             |             | Wen et al. (2007)         |
| ROS     | net melt       | 0.22                                                  | 0.11  | 81                                                | 40.5             |             | Jacobs et al. (1996)      |
|         | net melt       |                                                       |       | 48.5                                              | 18.6             |             | Loose et al. (2009)       |
|         | net melt       | 0.1                                                   |       |                                                   |                  |             | Reddy et al. (2010)       |
|         | grounding area | 0.12                                                  |       |                                                   |                  | max         | Holland et al. (2003)     |
|         | freeze-on      | -0.02                                                 |       |                                                   |                  | ave         | Holland et al. (2003)     |
|         | freeze-on      | 0 $\rightarrow$ -0.24                                 |       |                                                   |                  | ave         | Reddy et al. (2010)       |
|         | freeze-on      | 0 $\rightarrow$ -0.48                                 |       |                                                   |                  | max         | Reddy et al. (2010)       |
|         | shelf front    | 2.8                                                   | 1     | 14.67                                             |                  | 40 x 760 km | Horgan et al. (2011)      |
| RON-FIL | net melt       | 0.55                                                  |       | 202                                               | 101              |             | Jacobs et al. (1996)      |
|         | net melt       |                                                       |       | 83.4 <sup>1</sup>                                 | 24.8             |             | Joughin and Padman (2003) |
|         | net melt       |                                                       |       | 78.7 <sup>2</sup>                                 |                  |             | Joughin and Padman (2003) |
| RON     | net melt       |                                                       |       | 49.6 <sup>2b</sup>                                |                  |             | Joughin and Padman (2003) |
|         | grounding area |                                                       |       | 50.4 <sup>2</sup>                                 |                  |             | Joughin and Padman (2003) |
|         | freeze on      |                                                       |       | -56.7 <sup>2</sup>                                |                  |             | Joughin and Padman (2003) |
|         | shelf front    |                                                       |       | 55.9 <sup>2</sup>                                 |                  |             | Joughin and Padman (2003) |
| FIL     | net melt       | -0.35                                                 |       | 22.8                                              |                  |             | Grosfeld et al. (1998)    |
|         | net melt       |                                                       |       | 4.5 <sup>2d</sup>                                 |                  |             | Joughin and Padman (2003) |
|         | grounding area |                                                       |       | 20.6 <sup>2</sup>                                 |                  |             | Joughin and Padman (2003) |
|         | freeze-on      |                                                       |       | -16.1 <sup>2</sup>                                |                  |             | Joughin and Padman (2003) |
| OTHERS  | net melt       |                                                       |       | 450                                               | 225 <sup>5</sup> |             | Jacobs et al. (1996)      |

<sup>1</sup> Based on value computed from method 1 in Joughin and Padman (2003)

<sup>2</sup> Based on values computed from method 2, presented in Figure 2 in Joughin and Padman (2003)

<sup>3</sup> Summed from grounding area, freeze on, and shelf front values (See (Joughin and Padman, 2003))

<sup>4</sup> Summed from grounding area and freeze on values (See (Joughin and Padman, 2003))

<sup>5</sup> 50 % error reported for all the shelves (Jacobs et al., 1996) is repeated here.

## References

- Briggs, R. and Tarasov, L.: How to evaluate model derived deglaciation chronologies: A case study using Antarctica, *Quaternary Science Reviews*, 63, 109–127, doi:10.1016/j.quascirev.2012.11.021, 2013.
- Grosfeld, K., Hellmer, H., Jonas, M., Sandhger, H., Schulte, M., and Vaughan, D.: Marine ice beneath Filchner Ice Shelf Evidence from a multi-disciplinary approach, in: *Ocean, ice and atmosphere Interactions at the Antarctic continental margin*, edited by Jacobs, S. and Weiss, R., vol. 75 of *Antarct Res Ser*, pp. 319–339, AGU, Washington DC., 1998.
- Holland, D. M., Jacobs, S. S., and Jenkins, A.: Modelling the ocean circulation beneath the Ross Ice Shelf, *Antarctic Science*, 15, 13–23, doi:10.1017/S0954102003001019, 2003.
- Horgan, H., Walker, R., Anandakrishnan, S., and Alley, R.: Surface elevation changes at the front of the Ross Ice Shelf: Implications for basal melting, *Journal of Geophysical Research (Oceans)*, 116, C02005, doi:10.1029/2010JC006192, 2011.
- Jacobs, S., Hellmer, H., and Jenkins, A.: Antarctic ice sheet melting in the Southeast Pacific, *Geophysical Research Letters*, 23, 957–960, doi:10.1029/96GL00723, 1996.
- Jenkins, A. and Doake, C. S. M.: Ice-ocean interaction on Ronne Ice Shelf, Antarctica, *Journal of Geophysical Research*, 96, 791–813, doi:10.1029/90JC01952, 1991.
- Joughin, I. and Padman, L.: Melting and freezing beneath Filchner-Ronne Ice Shelf, Antarctica, *Geophysical Research Letters*, 30, 1477, doi:10.1029/2003GL016941, 2003.
- Loose, B., Schlosser, P., Smethie, W. M., and Jacobs, S.: An optimized estimate of glacial melt from the Ross Ice Shelf using noble gases, stable isotopes, and CFC transient tracers, *Journal of Geophysical Research (Oceans)*, 114, 8007, doi:10.1029/2008JC005048, 2009.
- Reddy, T. E., Holland, D. M., and Arrigo, K. R.: Ross ice shelf cavity circulation, residence time, and melting: Results from a model of oceanic chlorofluorocarbons, *Continental Shelf Research*, 30, 733–742, doi:10.1016/j.csr.2010.01.007, 2010.
- Rignot, E. and Jacobs, S. S.: Rapid Bottom Melting Widespread near Antarctic Ice Sheet Grounding Lines, *Science*, 296, 2020–2023, doi:10.1126/science.1070942, 2002.

Wen, J., Jezek, K. C., 6, B. M. C., Herzfeld, U. C., Farness, K. L., and Huybrechts, P.: Mass budgets of the Lambert, Mellor and Fisher Glaciers and basal fluxes beneath their flowbands on Amery Ice Shelf, *Science in China Series D: Earth Sciences*, 50, 1693–1706, doi:10.1007/s11430-007-0120-y, 2007.

Williams, M., Grosfeld, K., Warner, R., Gerdes, R., and Determann, J.: Ocean circulation and ice-ocean interaction beneath the Amery Ice Shelf, Antarctica, *Journal of Geophysical Research*, 106, 22 383–22 400, doi:10.1029/2000JC000236, 2001.

Yu, J., Liu, H., Jezek, K. C., Warner, R. C., and Wen, J.: Analysis of velocity field, mass balance, and basal melt of the Lambert Glacier-Amery Ice Shelf system by incorporating Radarsat SAR interferometry and ICESat laser altimetry measurements, *Journal of Geophysical Research (Solid Earth)*, 115, B11102, doi: 10.1029/2010JB007456, 2010.
